# Supplementary material for: Neural Substrates for the Association Between Cigarette Smoking and Parkinson's Disease
Source: Research Square preprint supplement (doi:10.21203/rs.3.rs-1029131/v1), 2021-11-11
Supplement: Supplementary file 1 [file 37c1d6ff30e57a65da6c6a83.docx]

| | smq1 | 1) In your lifetime, have you smoked 100 or more cigarettes (5 packs)? | | --- | --- | | smq2 | 2) In your lifetime, have you ever regularly smoked cigarettes, that is, at least one cigarette per day for 6 months or longer? | | smq3_age | 3) At what age (or in what year) did you first start regularly smoking cigarettes? | | smq3_year | 3) At what age (or in what year) did you first start regularly smoking cigarettes? | | smq3_9999 | Don't know/prefer not to answer | | smq4 | 4) Do you currently regularly smoke cigarettes? | | smq4_age | 4.1) At what age (or in what year) did you last stop regularly smoking cigarettes? | | smq4_year | 4.1) At what age (or in what year) did you last stop regularly smoking cigarettes? | | smq4_9999 | Don't know/prefer not to answer | | smq5 | 5) During all the years that you regularly smoked, did you ever stop smoking for a period of a year or more? | | smq5astart1 | At what age did you first stop smoking? | | smq5astop1 | At what age did you start smoking at least 1 cigarette per day again? | | smq5a1_9999 | Don't know/prefer not to answer | | smq5a1_more | Were there other periods when you temporarily quit smoking regularly? | | smq5astart2 | At what age did you stop smoking again? | | smq5astop2 | At what age did you start smoking at least 1 cigarette per day again? | | smq5a2_9999 | Don't know/prefer not to answer | | smq5a2_more | Were there other periods when you temporarily quit smoking regularly? | | smq5astart3 | At what age did you stop smoking again? | | smq5astop3 | At what age did you start smoking at least 1 cigarette per day again? | | smq5a3_9999 | Don't know/prefer not to answer | | smq5a3_more | Were there other periods when you temporarily quit smoking regularly? | | smq6_packs | 6) During the time that you regularly smoked, on average, how much did you smoke per day? (packs or cigarettes, 1 pack=20 cigarettes) | | smq6_cigs | 6) During the time that you regularly smoked, on average, how much did you smoke per day? (packs or cigarettes, 1 pack=20 cigarettes) | | smq6_9999 | Don't know/prefer not to answer | | smq7 | 7) Have you ever used smokeless tobacco such as chewing tobacco or snuff regularly, that is, at least once per day for 6 months or longer? | | smq8_age | 8) At what age (or in what year) did you first start regularly using smokeless tobacco? | | smq8_year | 8) At what age (or in what year) did you first start regularly using smokeless tobacco? | | smq8_9999 | Don't know/prefer not to answer | | smq9 | Do you currently smoke smokeless tobacco? | | smq9_age | 9) At what age (or in what year) did you last stop regularly using smokeless tobacco? | | smq9_year | 9) At what age (or in what year) did you last stop regularly using smokeless tobacco? | | smq9_9999 | Don't know/prefer not to answer | | smcomment | Comments: If you have any additional information about your use of tobacco, please provide it here. | | smoking_complete | if smoking completed |   **Smoking History Questionnaire** |
| --- | --- | --- | --- | --- | --- | --- | --- | --- | --- | --- | --- | --- | --- | --- | --- | --- | --- | --- | --- | --- | --- | --- | --- | --- | --- | --- | --- | --- | --- | --- | --- | --- | --- | --- | --- | --- | --- | --- | --- | --- | --- | --- | --- | --- | --- | --- | --- | --- | --- | --- | --- | --- | --- | --- | --- | --- | --- | --- | --- | --- | --- | --- | --- | --- | --- | --- | --- | --- | --- | --- |
